# Supplementary material for: Changes to cholesterol trafficking in macrophages by Leishmania parasites infection
Source: PubMed Central journal article supplement (PMC5552908; doi:10.1002/mbo3.469), 2017-03-27

**A**

24 h p.i.

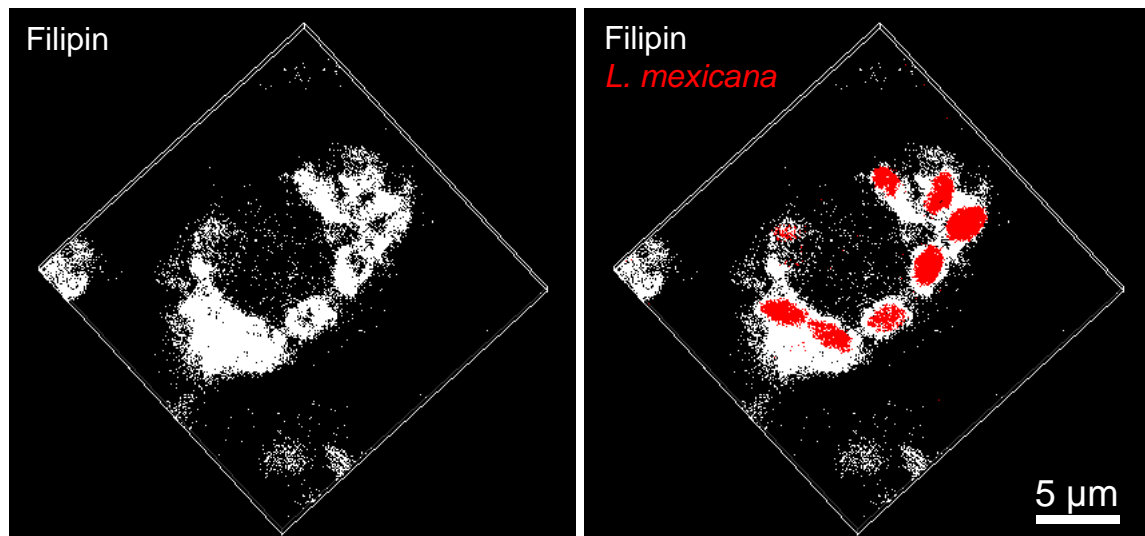**B**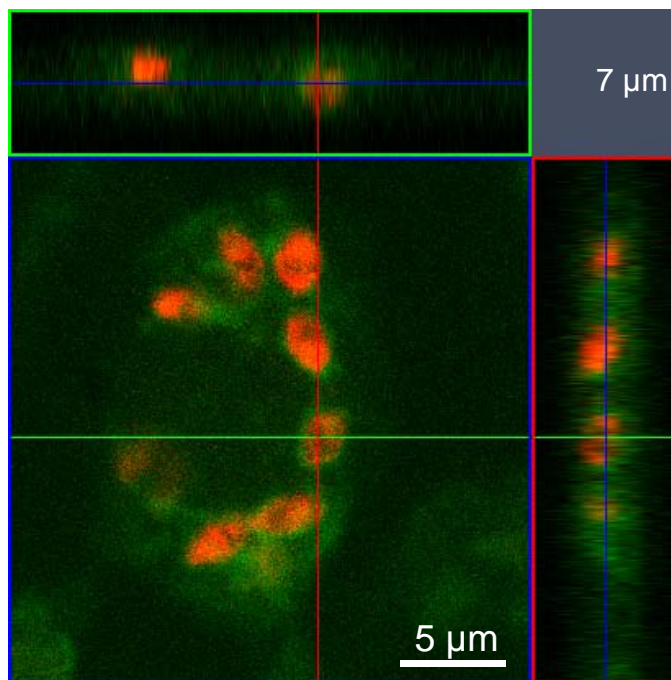

Supplement: MBO3-6-na-s003.pdf [file MBO3-6-na-s003.pdf]
